# Supplementary material for: A Multicenter Retrospective Comparison of Sequential versus Sandwich Chemoradiotherapy for Stage IE-IIE Extranodal Natural Killer/T-Cell Lymphoma, Nasal Type
Source: PubMed Central journal article supplement — J Cancer. 2018 Apr 12;9(9):1598–606. doi: 10.7150/jca.24310 (PMC5950589; doi:10.7150/jca.24310), 2018-04-12
Supplement: jcav09p1598s1.pdf [file jcav09p1598s1.pdf]

## Supplementary Tables

Table S1. Characteristics of patients with stage IE ENKTL.

| Characteristic    | Sequential Group (%) | Sandwich Group (%) | p     | All n (%)  |
|-------------------|----------------------|--------------------|-------|------------|
| Gender            |                      |                    | 0.694 |            |
| Male              | 61 (68.5)            | 50 (71.4)          |       | 111 (69.8) |
| Female            | 28 (31.5)            | 20 (28.6)          |       | 48 (30.2)  |
| Age               |                      |                    | 0.074 |            |
| >60               | 9 (10.1)             | 2 (2.9)            |       | 11 (6.9)   |
| ≤60               | 80 (89.9)            | 68 (97.1)          |       | 148 (93.1) |
| ECOG              |                      |                    | 0.864 |            |
| 0–1               | 88 (98.9)            | 69 (98.6)          |       | 157 (98.7) |
| 2–4               | 1 (1.1)              | 1 (1.4)            |       | 2 (1.3)    |
| LDH               |                      |                    | 0.701 |            |
| Elevated          | 24 (27.0)            | 17 (24.3)          |       | 41 (25.8)  |
| Normal            | 65 (73.0)            | 53 (75.7)          |       | 118 (74.2) |
| B symptoms        |                      |                    | 0.439 |            |
| Present           | 55 (61.8)            | 39 (55.7)          |       | 94 (59.1)  |
| Absent            | 34 (38.2)            | 31 (44.3)          |       | 65 (40.9)  |
| PINK              |                      |                    | 0.059 |            |
| Low-risk          | 77 (86.5)            | 64 (95.5)          |       | 141 (90.4) |
| Intermediate-risk | 12 (13.5)            | 3 (4.5)            |       | 15 (9.6)   |
| PINK-E            |                      |                    | 0.082 |            |

|                      |           |            |            |
|----------------------|-----------|------------|------------|
| Low-risk             | 38 (90.5) | 30 (100.0) | 68 (94.4)  |
| Intermediate-risk    | 4 (9.5)   | 0 (0.0)    | 4 (5.6)    |
| Local invasiveness   |           |            | 0.269      |
| Present              | 46 (51.7) | 30 (42.9)  | 76 (47.8)  |
| Absent               | 43 (48.3) | 40 (57.1)  | 83 (52.2)  |
| Chemotherapy regimen |           |            | 0.494      |
| GELOX                | 69 (77.5) | 57 (81.4)  | 126 (79.2) |
| SMILE                | 8 (9.0)   | 7 (10.0)   | 15 (9.5)   |
| VLP                  | 12 (13.5) | 6 (8.6)    | 18 (11.3)  |

Table S2. Characteristics of patients with stage IIE ENKTL.

| Characteristic    | Sequential Group (%) | Sandwich Group (%) | p     | All n (%) |
|-------------------|----------------------|--------------------|-------|-----------|
| Gender            |                      |                    | 0.363 |           |
| Male              | 19 (86.4)            | 26 (76.5)          |       | 45 (80.4) |
| Female            | 3 (13.6)             | 8 (23.5)           |       | 11 (19.6) |
| Age               |                      |                    | 0.301 |           |
| >60               | 4 (18.2)             | 3 (8.8)            |       | 7 (12.5)  |
| ≤60               | 18 (81.8)            | 31 (91.2)          |       | 49 (87.5) |
| ECOG              |                      |                    | 0.417 |           |
| 0–1               | 22 (100.0)           | 33 (97.1)          |       | 55 (98.2) |
| 2–4               | 0 (0.0)              | 1 (2.9)            |       | 1 (1.8)   |
| LDH               |                      |                    | 0.947 |           |
| Elevated          | 6 (27.3)             | 9 (26.5)           |       | 15 (26.8) |
| Normal            | 16 (72.7)            | 25 (73.5)          |       | 41 (73.2) |
| B symptoms        |                      |                    | 0.514 |           |
| Present           | 13 (59.1)            | 23 (67.6)          |       | 36 (64.3) |
| Absent            | 9 (40.9)             | 11 (32.4)          |       | 20 (35.7) |
| PINK              |                      |                    | 0.660 |           |
| Low-risk          | 17 (77.3)            | 32 (86.5)          |       | 49 (83.1) |
| Intermediate-risk | 4 (18.2)             | 4 (10.8)           |       | 8 (13.5)  |
| High-risk         | 1 (4.5)              | 1 (2.7)            |       | 2 (3.4)   |
| PINK-E            |                      |                    | 0.215 |           |

|                      |           |           |           |
|----------------------|-----------|-----------|-----------|
| Low-risk             | 7 (100.0) | 12 (80.0) | 19 (86.4) |
| Intermediate-risk    | 0 (0.0)   | 2 (13.3)  | 2 (9.1)   |
| High-risk            | 0 (0.0)   | 1 (6.7)   | 1 (4.5)   |
| Local invasiveness   |           |           | 0.397     |
| Present              | 16 (72.7) | 21 (61.8) | 37 (66.1) |
| Absent               | 6 (27.3)  | 13 (38.2) | 19 (33.9) |
| Chemotherapy regimen |           |           | 0.665     |
| GELOX                | 15 (68.2) | 25 (73.5) | 40 (71.4) |
| SMILE                | 3 (13.6)  | 4 (11.8)  | 7 (12.5)  |
| VLP                  | 4 (18.2)  | 5 (14.7)  | 9 (16.1)  |

Table S3. Characteristics of patients with ENKTL, who received sequential chemoradiotherapy.

| Characteristic  | RT+CT group (%) | CT+RT group (%) | p     | All n (%)  |
|-----------------|-----------------|-----------------|-------|------------|
| Gender          |                 |                 | 0.409 |            |
| Male            | 22 (66.7)       | 58 (74.4)       |       | 80 (72.1)  |
| Female          | 11 (33.3)       | 20 (25.6)       |       | 31 (27.9)  |
| Age             |                 |                 | 0.228 |            |
| >60             | 2 (6.1)         | 11 (14.1)       |       | 13 (11.7)  |
| ≤60             | 31 (93.9)       | 67 (85.9)       |       | 98 (88.3)  |
| ECOG            |                 |                 | 0.514 |            |
| 0–1             | 33 (100.0)      | 77 (98.7)       |       | 110 (99.1) |
| 2–4             | 0 (0.0)         | 1 (1.3)         |       | 1 (0.9)    |
| Ann Arbor stage |                 |                 | 0.186 |            |
| IE              | 29 (87.9)       | 60 (76.9)       |       | 89 (80.2)  |
| IIE             | 4 (12.1)        | 18 (23.1)       |       | 22 (19.8)  |
| LDH             |                 |                 | 0.370 |            |
| Elevated        | 7 (21.2)        | 23 (29.5)       |       | 30 (27.0)  |
| Normal          | 26 (78.8)       | 55 (70.5)       |       | 81 (73.0)  |
| B symptoms      |                 |                 | 0.604 |            |
| Present         | 19 (57.6)       | 49 (62.8)       |       | 68 (61.3)  |
| Absent          | 14 (42.4)       | 29 (37.2)       |       | 43 (38.7)  |
| PINK            |                 |                 | 0.591 |            |

|                      |            |           |           |
|----------------------|------------|-----------|-----------|
| Low-risk             | 29 (87.9)  | 65 (83.3) | 94 (84.7) |
| Intermediate-risk    | 3 (9.1)    | 13 (16.7) | 16 (14.4) |
| High-risk            | 1 (3.0)    | 0 (0.0)   | 1 (0.9)   |
| PINK-E               |            |           | 0.291     |
| Low-risk             | 10 (100.0) | 35 (89.7) | 45 (91.8) |
| Intermediate-risk    | 0 (0.0)    | 4 (10.3)  | 4 (8.2)   |
| Local invasiveness   |            |           | 0.151     |
| Present              | 15 (45.5)  | 47 (60.3) | 62 (55.9) |
| Absent               | 18 (54.5)  | 31 (39.7) | 49 (44.1) |
| Chemotherapy regimen |            |           | 0.986     |
| GELOX                | 25 (75.8)  | 59 (75.6) | 84 (75.7) |
| SMILE                | 3 (9.1)    | 8 (10.3)  | 11 (9.9)  |
| VLP                  | 5 (15.1)   | 11 (14.1) | 16 (14.4) |
